# Supplementary material
Source: publisher figshare collection journal article supplement (https://acs.figshare.com/ndownloader/files/4858744)
Supplement: Supplementary file 1 [file 4858744]

# Supporting Information

## Electric-field Induced Activation of Dark Excitonic States in Carbon Nanotubes

T. Uda, M. Yoshida, A. Ishii, Y. K. Kato

*Institute of Engineering Innovation, The University of Tokyo, Tokyo 113-8656, Japan*

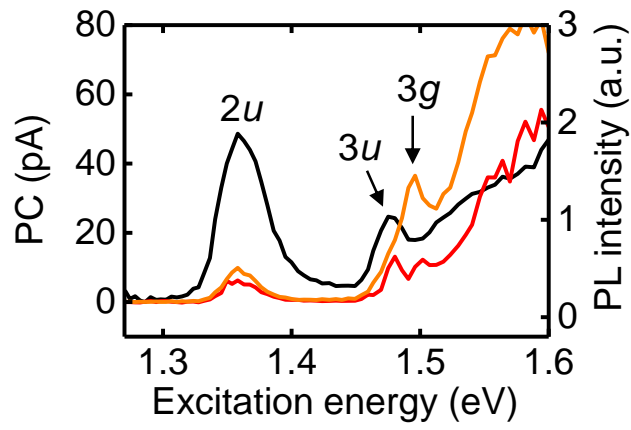

**Figure S1.** The same nanotube as in Figures 1-3 is measured under  $P = 100 \mu\text{W}$ . Red and orange curves are PC spectra measured at  $F = 0.33$  and  $0.67 \text{ V}/\mu\text{m}$ , respectively. Black curve is a PL excitation spectrum measured at  $F = 0.33 \text{ V}/\mu\text{m}$ .

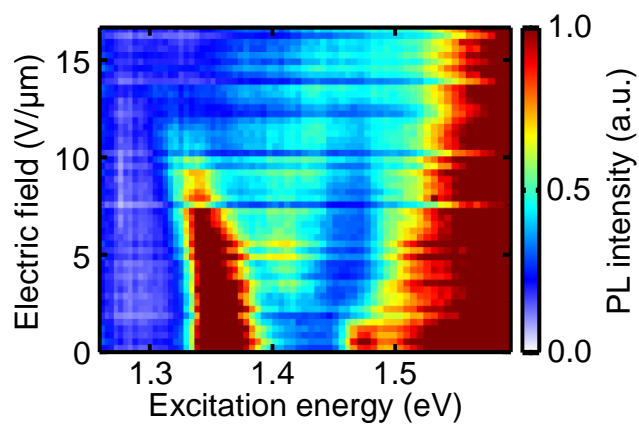

**Figure S2.** Electric field dependence of PL excitation spectra taken from  $F = 0.00$  to  $16.67 \text{ V}/\mu\text{m}$  with  $0.33 \text{ V}/\mu\text{m}$  step. The nanotube is the same as in Figures 1-3, and  $P = 100 \text{ }\mu\text{W}$  is used. The X peak can be seen at  $1.41 \text{ eV}$  around  $F = 5 \text{ V}/\mu\text{m}$ .

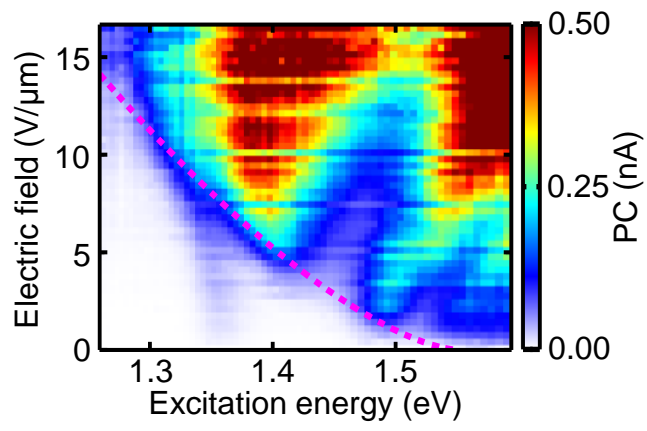

**Figure S3.** Electric field dependence of PC spectra taken from  $F = 0.00$  to  $16.67 \text{ V}/\mu\text{m}$  with  $0.33 \text{ V}/\mu\text{m}$  step. The nanotube is the same with Figures 1-3, and  $P = 100 \text{ } \mu\text{W}$  is used. Pink dotted curve shows  $E_b^{3/2}$  dependence of the boundary.
